# Supplementary material for: ZIF-8-porous ionic liquids for the extraction of 2,2,3,3-tetrafluoro-1-propanol and water mixture
Source: Royal Society of Chemistry journal article supplement (doi:10.1039/d1nj01053k), 2021-01-01
Supplement: d1nj01053k1.pdf [file d1nj01053k1.pdf]

## Supplementary Information

(Manuscript ID: NJ-ART-03-2021-001053)

### ZIF-8-porous ionic liquids for the extraction of 2,2,3,3-tetrafluoro-1-propanol and water mixture

Zenghui Wang,<sup>a</sup> Pingping Zhao,<sup>\*a,b</sup> Jimin Wu,<sup>a</sup> Jun Gao,<sup>a</sup> Lianzheng Zhang,<sup>a</sup> and Dongmei Xu,<sup>\*a</sup>

<sup>a</sup> College of Chemical and Biological Engineering, Shandong University of Science and Technology, Qingdao 266590, China

E-mail: zhaopingping@sdust.edu.cn

E-mail: xudongmei@sdust.edu.cn

<sup>b</sup> Shandong Key Laboratory of Biochemical Analysis, College of Chemistry and Molecular Engineering, Qingdao University of Science and Technology, Qingdao 266042, P. R. China

E-mail: zhaopingping@sdust.edu.cn

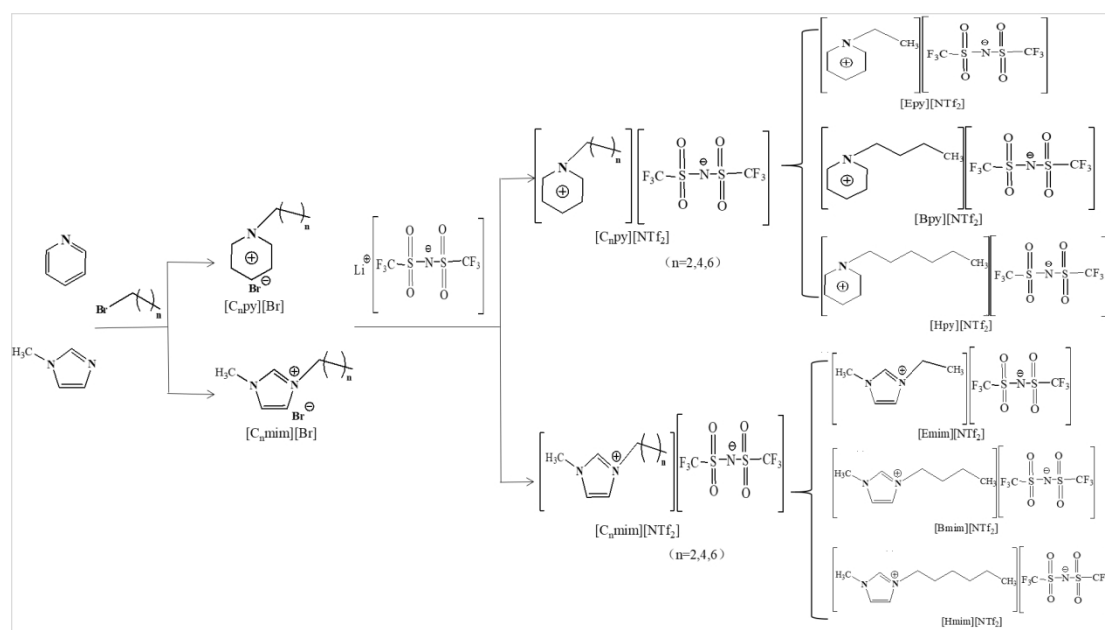

Scheme.S1 Synthesis of various ionic liquids

**Table S1** Conditions of GC analysis

| Name          | Characteristic | Description                                                         |
|---------------|----------------|---------------------------------------------------------------------|
| Packed column | Specification  | GDX-403(2 m×0.53 mm×1.00 μm),<br>Zibo Gannuo Instrument Co., Ltd    |
| Pre-column    | Specification  | GDX-403(10 cm×0.53 mm×1.00 μm),<br>Zibo Gannuo Instrument Co., Ltd. |
| Carrier gas   | Type           | Hydrogen                                                            |
|               | Purity         | 0.9999                                                              |
|               | Flow rate      | 50 mL/min                                                           |
| Injector      | Temperature    | 443.15 K                                                            |
| Oven          | Temperature    | 423.15 K                                                            |
| Detector      | Type           | Thermal conductivity detector (TCD)                                 |
|               | Temperature    | 443.15 K                                                            |

**Table S2** The CHNS and ICP elemental analysis of sample and calculated value of Zn(Mim)<sub>2</sub>

| Samples                                                                               | C/%   | H/%  | N/%   | Zn/%  |
|---------------------------------------------------------------------------------------|-------|------|-------|-------|
| ZIF-8=Zn(C <sub>4</sub> H <sub>5</sub> N <sub>2</sub> ) <sub>2</sub> calculated value | 42.29 | 4.40 | 24.67 | 28.63 |
| ZIF-8 sample                                                                          | 41.58 | 4.42 | 24.35 | 27.96 |

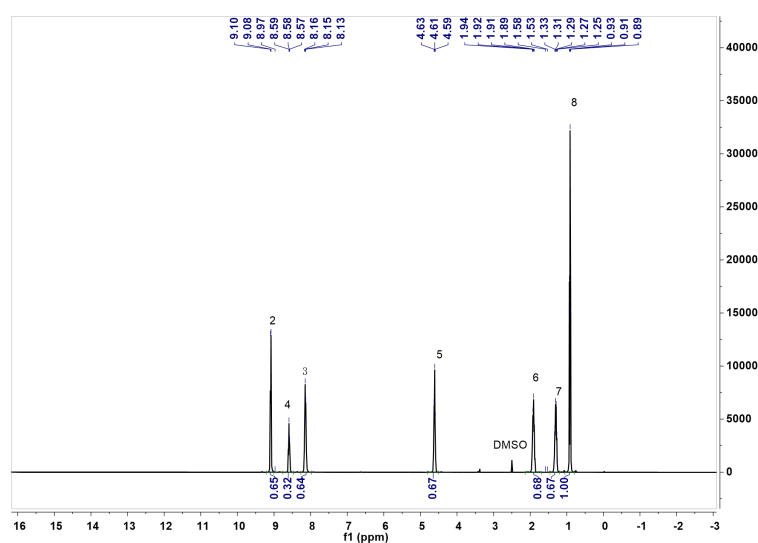**Fig.S1** <sup>1</sup>H NMR spectra of [Bpy][NTf<sub>2</sub>]

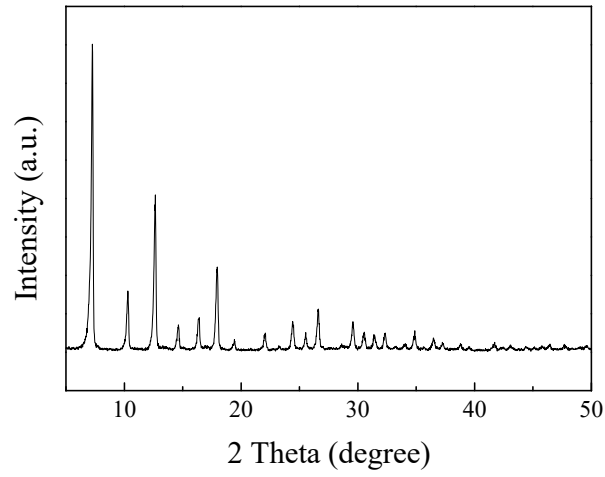

**Fig.S2** XRD pattern of ZIF-8

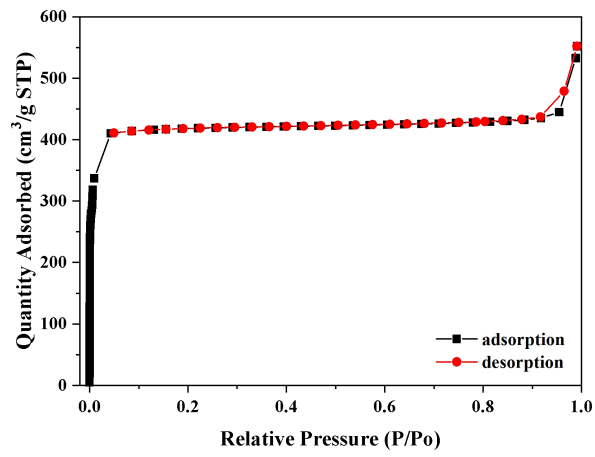

**Fig.S3** N<sub>2</sub> adsorption and desorption curves of ZIF-8.

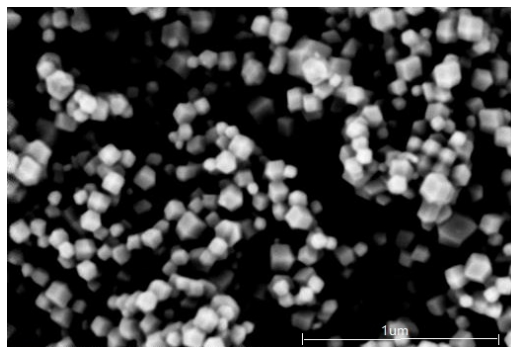

**Fig.S4 (A).** The SEM image of ZIF-8

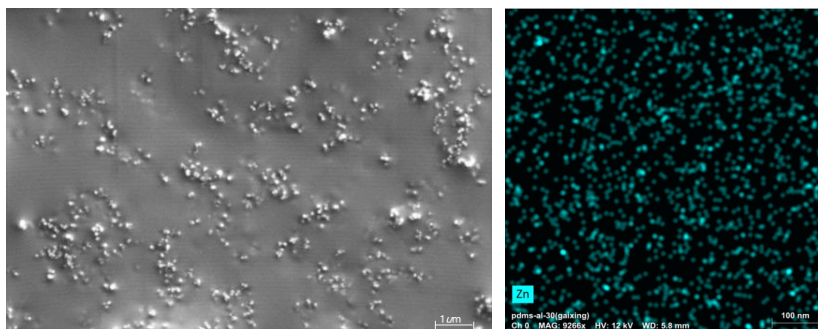

**Fig.S4 (B).** The SEM image and Zn elemental mapping of ZIF-8/[Bpy][NTf<sub>2</sub>].

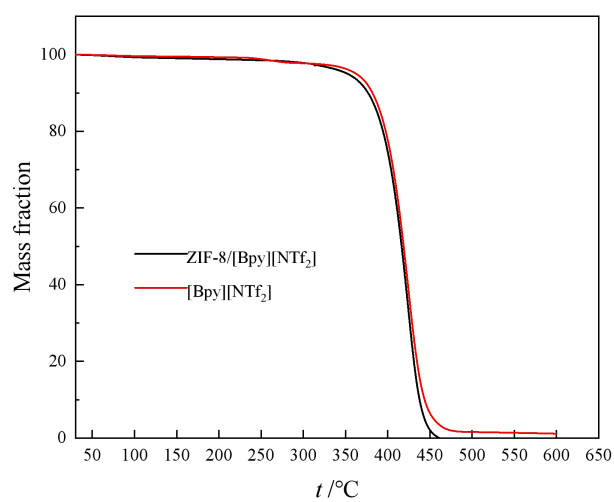

**Fig.S5** TGA curves of [Bpy][NTf<sub>2</sub>] and ZIF-8/[Bpy][NTf<sub>2</sub>].
